# Supplementary material for: Willingness-to-pay for a probabilistic flood forecast: a risk-based decision-making game
Source: Copernicus journal article supplement (doi:10.5194/hess-20-3109-2016), 2016-08-02
Supplement: Supplementary file 1 [file hess-20-3109-2016-supplement.zip]

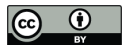

## *Supplement of*

# **Willingness-to-pay for a probabilistic flood forecast: a risk-based decision-making game**

**L. Arnal et al.**

*Correspondence to:* Louise Arnal (l.l.s.arnal@pgr.reading.ac.uk)

- hess-20-3109-2016-supplement-title-page.pdf
- supplement
  - data.txt

The copyright of individual parts of the supplement might differ from the CC-BY 3.0 licence.
